# Supplementary material
Source: PubMed Central journal article supplement (PMC5395101)
Supplement: 2017_165142-Disclosures_and_Contributions.pdf [file 2017_165142-Disclosures_and_Contributions.pdf]

Haematologica  
HAEMATOL/2017/165142  
Version 2

Acute lymphoblastic leukemia of the central nervous system - on the  
role of PBX1

Ameera Alsadeq and Denis M. Schewe

Disclosures: The authors have no conflict of interest to declare.

Contributions: AA and DS wrote and edited the manuscript together.
